# Supplementary material for: Multifaceted Optimization of MSC-Based Formulation upon Sodium Iodoacetate-Induced Osteoarthritis Models by Combining Advantageous HA/PG Hydrogel and Fluorescent Tracer
Source: Hindawi journal article supplement (doi:10.1155/2021/8827212), 2021-01-23
Supplement: f1 [file 8827212.f1.docx]

# Multifaceted Optimization of MSC-based Formulation upon Sodium Iodoacetate-induced Osteoarthritis Models by Combining Advantageous HA/PG Hydrogel and Fluorescent Tracer

Ai-tong Wang,1,2# Meng Zhao,2# Ying Feng,2 Honghong Jia,2 Leisheng Zhang,1, 3-5* Hao Yu,2* Zongjin Li,1 Zhibo Han, 2, 4 Zhongchao Han,2-5

1 School of Medicine, Nankai University, Tianjin 300071, China.

2 Cell products of National Engineering Center & National Stem Cell Engineering Research Center, Tianjin IMCELL Stem Cell and Gene Technology Co., Ltd., Tianjin 300450, China.

3 Precision Medicine Division, Health-Biotech (Tianjin) Stem Cell Research Institute Co., Ltd., Tianjin 301700, China.

4 State Key Laboratory of Experimental Hematology & National Clinical Research Center for Blood Disease, Institute of Hematology & Blood Diseases Hospital, Chinese Academy of Medical Sciences & Peking Union Medical College, Tianjin 300020, China.

5 Jiangxi Research Center of Stem Cell Engineering, Jiangxi Health-Biotech Stem Cell Technology Co., Ltd., Shangrao 334000, China.

# The two authors contribute equally to the work.

* Corresponding author: zhangleisheng@health-biotech.com, yuhao@amcellgene.com.

Correspondence should be addressed to Leisheng Zhang; zhangleisheng@health-biotech.com

## Supplementary Materials

Supplementary Table S1. Primers used in this study.

Real-time PCR primer sequences.

| Gene | Forward sequence (5’→3’) | Reverse sequence (3’→5’) |
| --- | --- | --- |
| *ACTIN* | CTCTTCCAGCCTTCCTTCCT | AGCACTGTGTGTTGGCGTACAG |
| *ADIPOQ* | TGGTCCTAAGGGAGACATCG | TGGAATTTACCAGTGGAGCC |
| *PPAR-γ* | GCTGGCCTCCTTGATGAATA | TGTCTTCAATGGGCTTCACA |
| *RUNX2* | CTCACTACCACACCTACCTG | TCAATATGGTCGCCAAACAGATTC |
| *BGLAP* | GGCGCTACCTGTATCAATGG | TCAGCCAACTCGTCACAGTC |
| *ACAN* | CCCCTGCTATTTCATCGACCC | GACACACGGCTCCACTTGAT |
| *SOX9* | AATGGAGCAGCGAAATCAAC | CAGAGAGATTTAGCACACTGATC |

Supplementary Table S2. Antibodies used in this study.

Antibodies for flow cytometry.

| Antibody |  | Cat. NO. | Source |
| --- | --- | --- | --- |
| Anti-human CD73-PE/Cy7 |  | 344009 | BioLegend |
| Anti-human CD90-FITC |  | 555595 | BD Pharmigen |
| Anti-human CD105-APC |  | 800507 | BioLegend |
| Anti-human CD31-PE |  | 560975 | BD Pharmigen |
| Anti-human CD34-PE/Cy7 |  | 343515 | BioLegend |
| Anti-human CD45-APC |  | 560915 | BD Pharmigen |
| Anti-human HLA-DR-PE |  | 560943 | BD Pharmigen |

Supplementary Table S3. ELISA kits used in this study.

| Name | Company | Catalog | Host |
| --- | --- | --- | --- |
| IL-1β | FANKEW | [F4207-A](http://www.shfksc.com/cp_view.asp?id=57488) | Rabbit |
| IL-6 | FANKEW | F7042-B | Rabbit |
| MMP13 | CUSABIO | CSB-E14220Rb | Rabbit |
| TGF-β1 | FANKEW | [F4141-A](http://www.shfksc.com/cp_view.asp?id=57356) | Rabbit |
| D-Lucifer | CAYMAN | 14681 | Rabbit |

## Supplementary Procedures

**Histopathological analysis**

The preparation for histopathological analysis was displayed as we recently reported with several modification[1]. Full-thickness samples (including femoral condyles and tibial plateau) were collected and fixed in 10% formaldehyde (Shanghai GeFan Biotechnology Co., Ltd, China) for 48 hours, decalcified using 10% ethylenediaminetetraacetic acid solution (EDTA, Sigma-Aldrich) for two to three mouths. The paraffin-embedded section (4μm in thickness) were cut and deparaffinized. For evaluation of OA, the slices were stained with hematoxylin & eosin (H&E), safranin-O/fast green and alcian blue stains (Beijing Solarbio Science & Technology Co., Ltd. China), respectively. Microphotographs were taken using a light microscope (Olympus, BX51, Japan). The grade of osteoarthritic change of all femoral condyles and tibial plateau were analysed by the established Mankin’s score grading for osteoarthritis cartilage histopathology. Image analysis was performed using free software Image J 1.50i, and the percentage stain area was estimated using the following relation: sem percentage = (sem/mean) ×100 [24]. Where sem is the standard error mean for the measured parameter. All samples were evaluated independently by two observers who were blinded to sample information.

***In vivo* tracking of UC-MSCs (with/without HA/PG) in OA rats**

This experiment was performed using SD rats, which is approved by the Institutional Animal Care and Use Committee of Institute of Radiation Medicine. For each rat, anesthesia was maintained with isoflurane, both of legs were then injected by using MIA as previously described. To monitor the migration and [metabolism](javascript:;) characters of an optimal formulation (UC-MSCs with/without HA/PG hydrogel) *in vivo* by bioluminescence imaging (BIL), which was performed using IVIS Lumina II system (Xenogen Corporation, Hopkinton, MA). As shown in Fig-1, to establish the UC-MSCs co-expressing firefly luciferase (Fluc) gene and green fluorescent protein (GFP) by means of a lentiviral system. GFP+ UC-MSCs/Fluc were suspended in D-luciferin (33ul/mg; Cayman Chemical, USA) before intra-articular injection. Then, the anesthetized OA rats were intra-articular injected with Luc-GFP+ UC-MSCs and Luc-GFP+ UC-MSCs + HA/PG hydrogel (optimal formulation), respectively. The UC-MSCs (without Luc-GFP+) and UC-MSCs (without Luc-GFP+) + HA/PG composite hydrogel were served as controls. Subsequently, the substrate was joint cavity, and the OA rats were transferred to the light-sealed imaging cabinet of the IVIS machine. Bioluminescent images were acquired with a charge-coupled device camera cooled to −80°C to achieve maximal sensitivity. Images were acquired 1, 2, 4 and 6 days with an exposure time of 10 min. BLI signals were quantified in units of maximum photons per second per centimeter squared per steradian (P/s/cm2/sr).

**Chromosome karyotyping**

With the aid of a G-banding technique, the genomic stability of hUC-MSCs was monitored by using karyotypic analysis as we recently reported[2]. Briefly, the hUC-MSCs in metaphase were photographed under an Olympus DA71 microscope (Tokyo, Japan) and the chromosome karyotyping of the cells were analyzed as well.

**Trilineage differentiation analysis of hUC-MSCs**

The multilineage differentiation potential of hUC-MSCs towards adipocytes, osteoblasts and chondrocytes were conducted as we described previously[1, 3]. Briefly, the hUC-MSCs were seeded at a density of 2×104 cells/cm2 in DMEM/F12 medium (Hyclone) containing 10% FBS (Gibco), 1% penicillin-streptomycin (Gibco), 1% L-glutamine (Gibco). When cells reached 80% confluence, the medium was changed into adipogenic differentiation medium (MesenCult™ Adipogenic Differentiation Kit, Stem Cell Technologies), osteogenic differentiation medium (MesenCult™ Osteogenic Differentiation Kit, Stem Cell Technologies) or chondrogenic differentiation medium (MesenCult™-ACF Chondrogenic Differentiation Kit, Stem Cell Technologies), respectively. The morphology of hUC-MSC-derived adipocytes, osteoblasts or chondrocytes were shown by Oil red O staining, Alizarin red staining or Alcian blue staining after 18 days’ differentiation and photographed with a Nikon ElipseTi-U microscope (Nikon), respectively. The undifferentiated hUC-MSCs were used as negative controls. For quantitative analyses of adipogenic-, osteogenic- or chondrogenic-associated gene expression, the differentiatiated hUC-MSCs at day 18 were washed with 1×PBS and lysed with TRIzol reagent (ThermoFisher) for total RNA extraction and expression detection. The primer sequences of the abovementioned genes were listed in Supplementary Information: Supplementary Table S1.

**Population doubling (Pd) assay**

The Pd analysis of derived hUC-MSCs were displayed as we recently reported[2]. In details, 1×104 hUC-MSCs (H1 hESC-MSCs, BC1 hiPSC-MSCs) were collected and seeded into 3cm2 plates. hUC-MSCs were cultured for 7 days and the culture medium was changed every 3.5 days. Pd number (PDN) was calculated by utilizing the formula PDN=logN/N0×3.31, Pd time (PDT) was calculated as following: PDT= (t-t0)×log2/log(Nt-N0). N0 and Nt represents the initially seeded and harvested cell number, respectively. t-t0 represents the duration of cell culture.

**cDNA synthesis and real-time PCR (qRT-PCR) assay**

The total mRNA was isolated with TRIzol reagent (Thermo) from hUC-MSCs or hUC-MSC-derived cells as we reported before[4]. Then, cDNA was synthesized by conducting reverse transcription polymerase chain reaction (RT-PCR) with the TransScript Fly First-Strand cDNA Synthesis SuperMix Kit (Transgen Biotech). The expressive abundances of the indicated genes were detected by utilizing the SYBR Green PCR Master Mix (Qiagen) together with ABI PRISM 7900 (Applied Biosystems). The primer sequences were listed in Supplementary Information: Supplementary Table S2.

**Preparation for** **hUC-MSCs and HA/PG hydrogel Composite**

UC-MSCs was prepared and purchased from the Cell products of National Engineering Center & National Stem Cell Engineering Research Center, then thoroughly mixed with 1% HA to create MSCs and HA/PG hydrogel composites. In details, the mesenchymal tissue (in Wharton’s jelly) was diced into cubes of about 0.1 cm3 and centrifuged at 250×g for 5 minutes. After removal of the supernatant fraction, the precipitate (mesenchymal tissue) was washed with DPBS and centrifuged at 250g for 5 minutes. The mesenchymal tissue was treated with 0.1% collagenase at 37°C overnight, washed twice, and further digested with 0.25% trypsin at 37°C for 60 minutes. Fetal bovine serum (FBS) was added to the mesenchymal tissue to neutralize the excess trypsin. Cells were plated in DMEM/F12 supplemented with 10% fetal bovine serum. The medium was renewed every 2 to 3 days and suspended cells were discarded. After reaching 80% to 90% confluence, cells were harvested with 0.25% trypsin and 0.02% EDTA and replanted at 1:3 under the same condition.

**Ethics approval**

The experiment on rabbits and rats followed the internationally recognized guidelines. Meanwhile, ethical approval of animal research was signed by the Ethics Committee of Eye Hospital of Tianjin Medical University (approval number: TJYY2018061114) in accordance with the Helsinki declaration.

**Animals**

28 healthy New Zealand white male rabbits (weight, 2-2.25 kg) were used in this study. All animals were obtained 1 week before the experiment and were raised in the same environment. Rabbits are kept in the experimental animal room of Chinese Academy of Medical Sciences & Peking Union Medical College Institute of Radiation Medicine. All procedures and experimental protocols were reviewed and approved by the Institutional Animal Care and Use Committee at our institution. This study followed the National Institutes of Health guidelines regarding the care and use of laboratory animals.

**MIA-induced OA rabbit model**

The abovementioned rabbits were divided into seven experimental groups, four rabbits served as a control (8 knee joints) for detecting the histologically normal appearance of the Knee joint. After 1 weeks, anesthesia was induced by using a 3.5% isoflurane to oxygen mixture. Using a hair removal cream to remove the rabbit wool at the knee joint, the leg skin was sterilized with 75% ethyl alcohol and the knee located by palpation. 100μl doses of 2% concentrations of monosodium iodoacetate (MIA, Sinopharm Group Tianjin Co., Ltd, China) were injected into joints of each group using an arthrocentesis technique. Then, a needle was inserted vertically to penetrate the skin and turned distally for insertion into the articular cavity until a distinct loss of resistance was felt. No animal was excluded owing to an abnormal clinical finding.

**Cartilage histology**

In preparation for histology and immunohistochemistry, they were fixed in 10% formaldehyde. Decalcified in Ethylenediaminetetraacetic acid disodium salt solution, and embedded in paraffin wax. Paraffin-embedded sections (4 μm in thickness) were cut and deparaffinized. For histological analysis, hematoxylin and eosin (H & E) staining, Safranin-O staining and Alcian blue staining.

**Measurement of the percentages of areas with specific staining**

Microscopy images were captured by LEICA microscopy system. As described by Hao Yu *et al*[5], who introduced the quantitative analysis of histological staining using ImageJ. In this study, histological assessment of H&E, Alcian blue and Sirius red for cell matrix, GAG and collagen were performed by using Image J as following:

① The image was opened with Image J, then the image was adjusted to color threshold. (Threshold values were defined)

② Color Threshold from Red to B&W (arrow) was changed;

③ Color image was converted to grayscale: Image → Type → 8-bit. Image → Adjust →Threshold → BW → apply. Analyze → Set scale;

④ Values were selected as depicted. OK was selected.

⑤ To eliminate background noise Edit → Clear outside was elected. To measure pixel number in selected area Analyze → Measure was chosen.

⑥ Positive area was determined by Analyze. Value was recorded.

⑦ Percentage of positive area was calculated by equations: sem percentage= (sem / mean) × 100.

**The Study Scheme**

A total number of 28 New Zealand white male rabbits received an injection of MIA in the two-time intervals (2 and 4 weeks). Starting at 6 weeks after the OA, rabbits were injected every two weeks for 6 weeks with a material according to the experimental groups. After 12 weeks, all the rabbits were euthanized by inhalation of 3.5% isoflurane followed by an intraperitoneal injection of 3% sodium pentobarbital 45 mg/kg, but also, the stifle joint samples and synovial fluid were collected. The therapeutic efficacy of seven experimental groups were evaluated by macroscopic, histological and cytokine analysis, then using the principal component analysis (PCA) to screen out an optimal formulation. Furtherly, for the tracking study Luc-GFP+-labeled an optimal formulation of UC-MSCs (with/without HA/PG) were injected into each MIA-induced OA rat to track cell signals by performing bioluminescence imaging.

**Routine tests & Macroscopic examination**

During the osteoarthritis model and treatment, we were measured changes in rabbit weight and joint circumference. The surface of distal femur was exposed and examined macroscopically. To assess the histological cartilage repair efficacy, sections were analyzed using a modified Mankin’s score. The nature of the predominant tissue, structural characteristics (surface regularity, structural integrity, thickness, bonding to the adjacent cartilage), freedom from cellular changes of degeneration (hypocellularity, chondrocyte clustering), and freedom from degenerative changes in adjacent cartilage were assessed. The grade of osteoarthritic change of all femoral condyles was analysed by the established Mankin’s score grading for osteoarthritis cartilage histopathology. All samples were evaluated independently by two observers who were blinded to sample information.

**Principal Component Analysis (PCA)**

The effects of treatment groups and their correlation with the others parameters were determined statistically by means of the Principal Component Analysis method (PCA), which through the XLSTAT software (Addinsoft, New York, USA).

**Supplementary References**

[1] L. Zhang, H. Wang, C. Liu, Q. Wu, P. Su, D. Wu, J. Guo, W. Zhou, Y. Xu, L. Shi, J. Zhou, MSX2 Initiates and Accelerates Mesenchymal Stem/Stromal Cell Specification of hPSCs by Regulating TWIST1 and PRAME, Stem Cell Reports, 11 (2018) 497-513.

[2] J. Huo, L. Zhang, X. Ren, C. Li, X. Li, P. Dong, X. Zheng, J. Huang, Y. Shao, M. Ge, J. Zhang, M. Wang, N. Nie, P. Jin, Y. Zheng, Multifaceted characterization of the signatures and efficacy of mesenchymal stem/stromal cells in acquired aplastic anemia, Stem Cell Res Ther, 11 (2020) 59.

[3] X. Zhang, Y. Yang, L. Zhang, Y. Lu, Q. Zhang, D. Fan, Y. Zhang, Y. Zhang, Z. Ye, D. Xiong, Mesenchymal stromal cells as vehicles of tetravalent bispecific Tandab (CD3/CD19) for the treatment of B cell lymphoma combined with IDO pathway inhibitor D-1-methyl-tryptophan, J Hematol Oncol, 10 (2017) 56.

[4] Y. Wei, H. Hou, L. Zhang, N. Zhao, C. Li, J. Huo, Y. Liu, W. Zhang, Z. Li, D. Liu, Z. Han, L. Zhang, B. Song, Y. Chi, Z. Han, JNKi- and DAC-programmed mesenchymal stem/stromal cells from hESCs facilitate hematopoiesis and alleviate hind limb ischemia, Stem Cell Res Ther, 10 (2019) 186.

[5] H. Yu, G. Cauchois, J.F. Schmitt, N. Louvet, J.L. Six, Y. Chen, R. Rahouadj, C. Huselstein, Is there a cause-and-effect relationship between physicochemical properties and cell behavior of alginate-based hydrogel obtained after sterilization?, J Mech Behav Biomed Mater, 68 (2017) 134-143.
